# Supplementary material
Source: PubMed Central journal article supplement (PMC2685721)

**MYH9**

**Cochlea**

**Brain #1**

**Brain #2**

**200 kD**

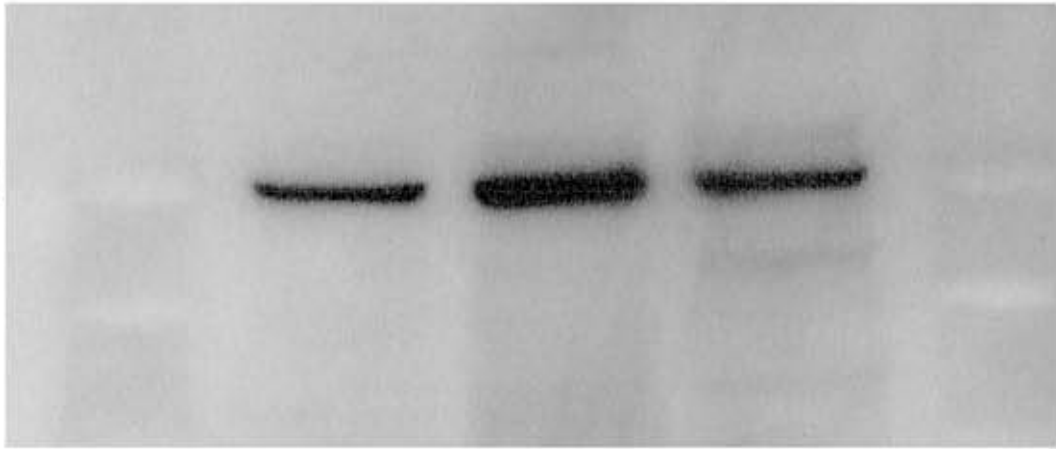

**MYH10**

**200 kD**

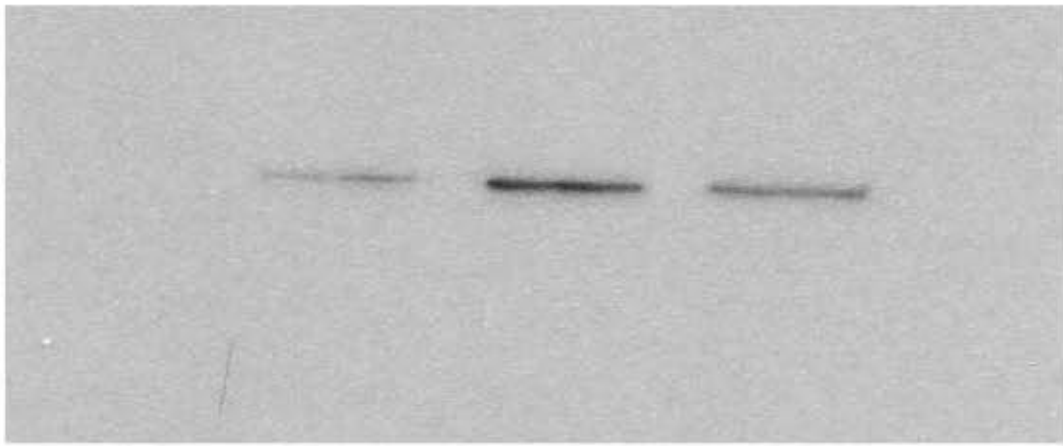

**MYH14**

**200 kD**

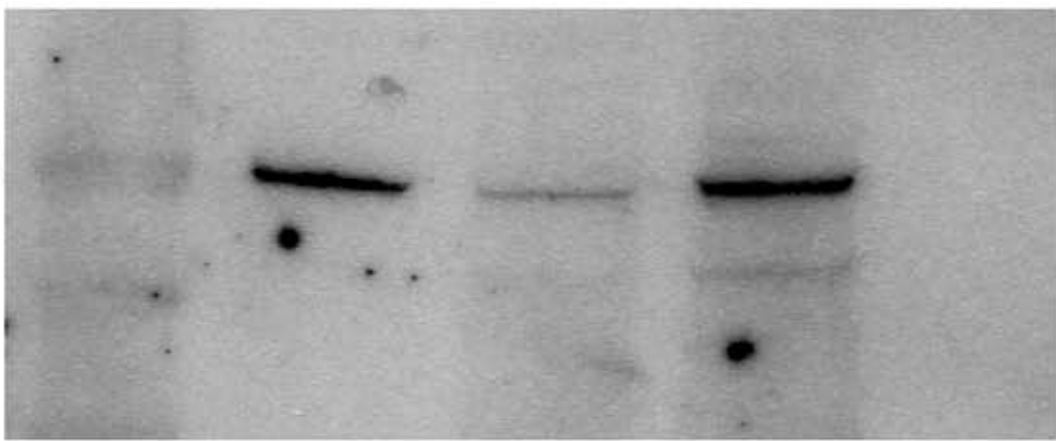

**$\beta$ -Actin**

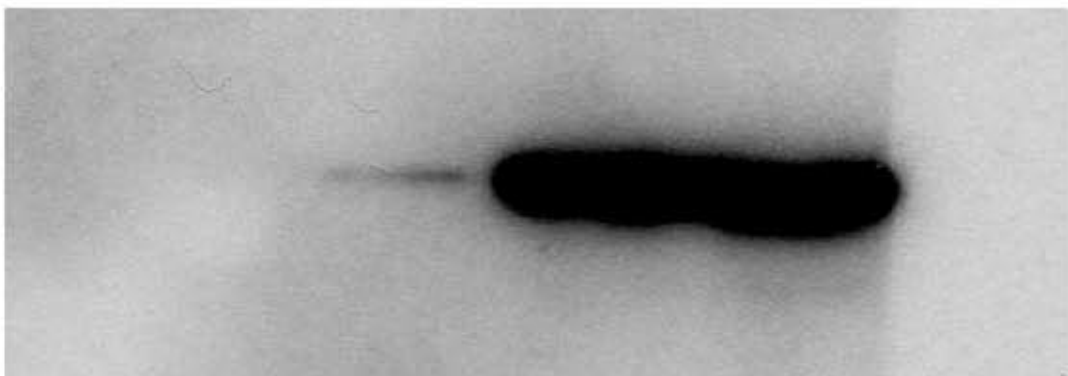

Supplement: supp_136_12_1977__1.pdf [file supp_136_12_1977__1.pdf]

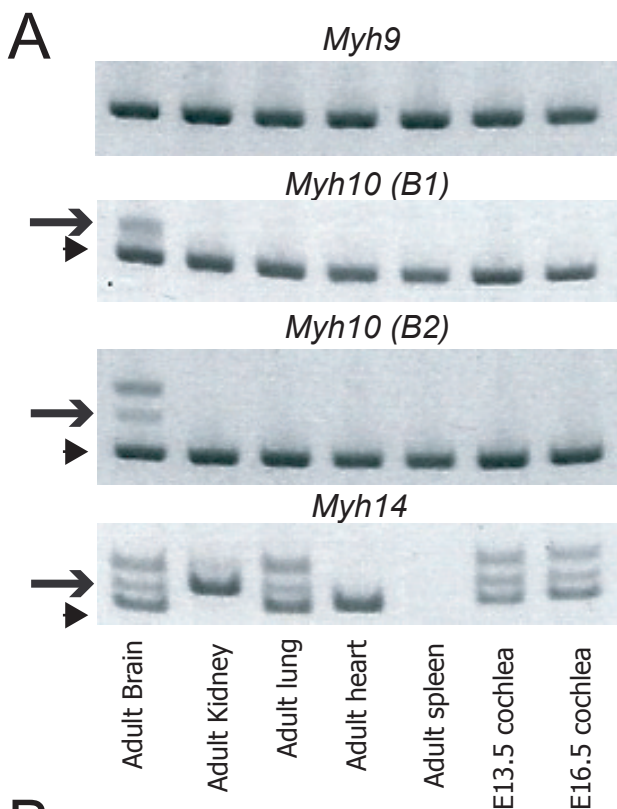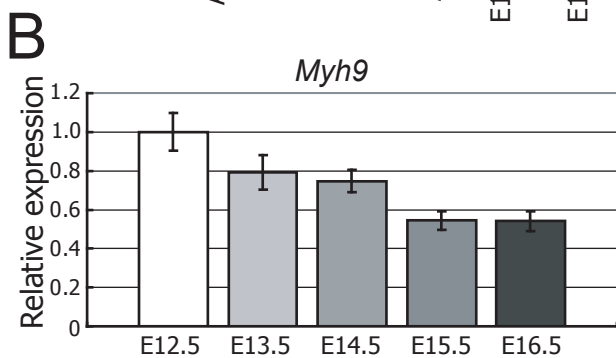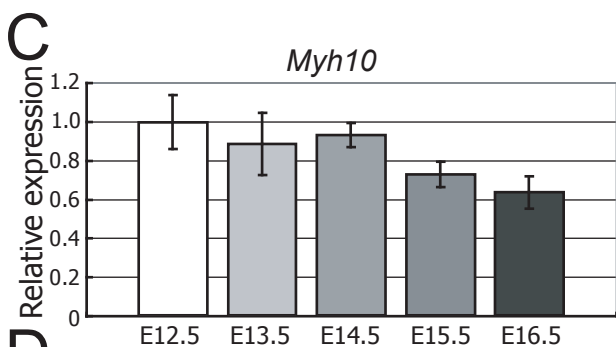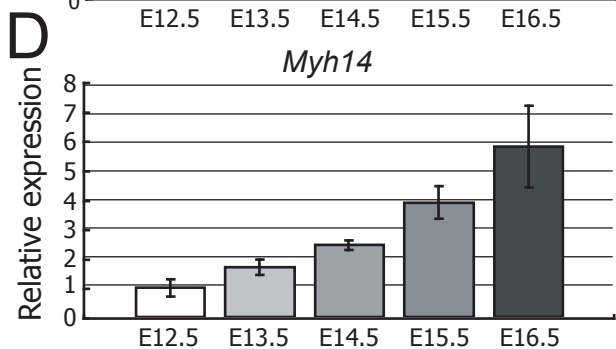

Supplement: supp_136_12_1977__2.pdf [file supp_136_12_1977__2.pdf]

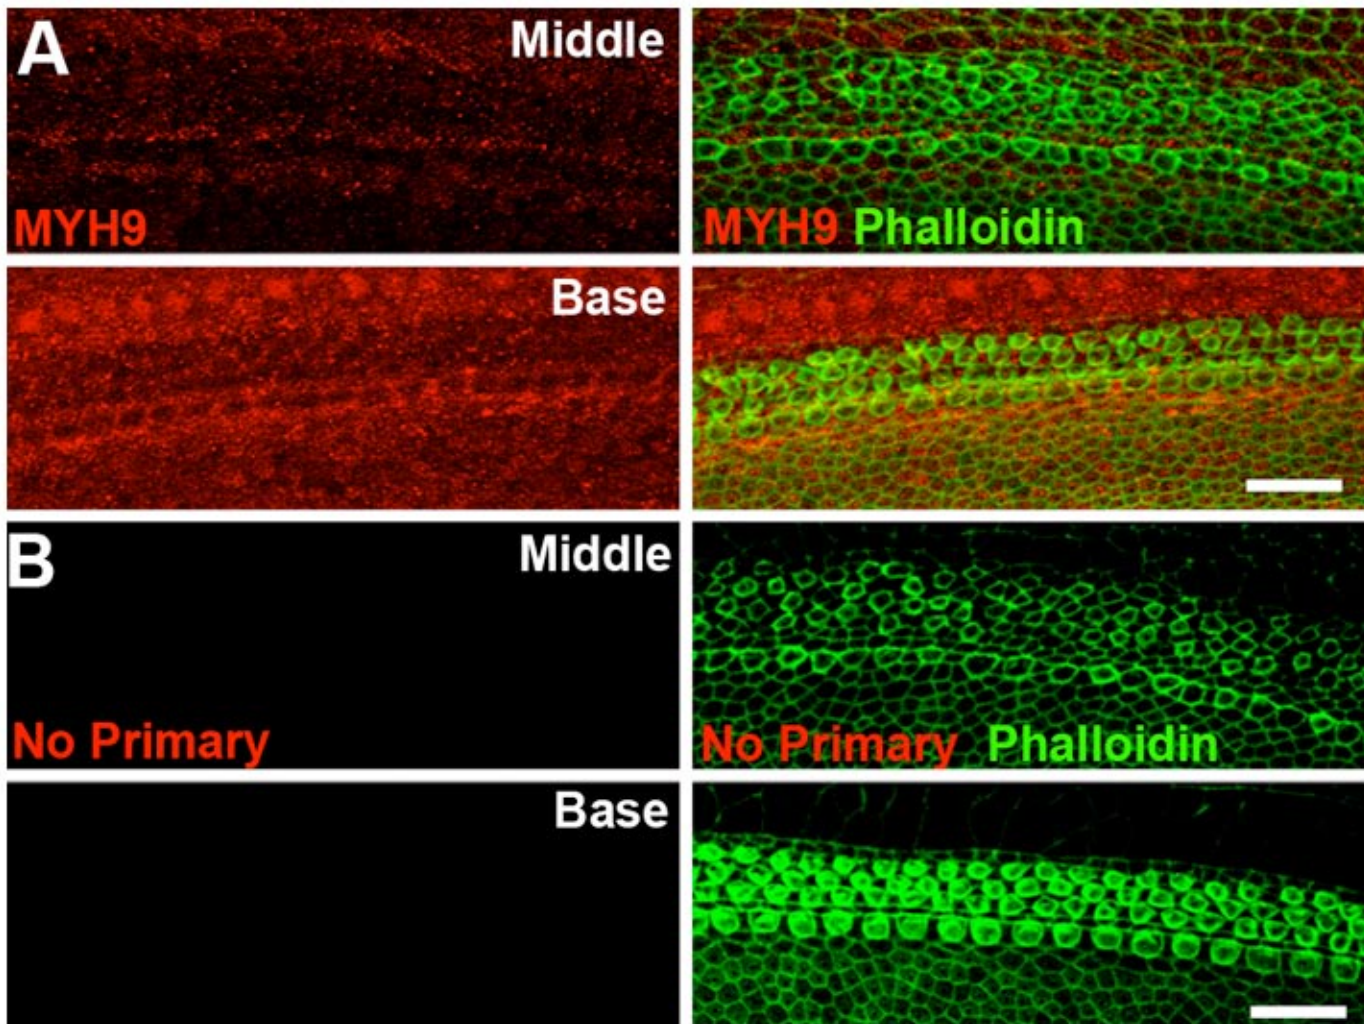

Supplement: supp_136_12_1977__3.pdf [file supp_136_12_1977__3.pdf]

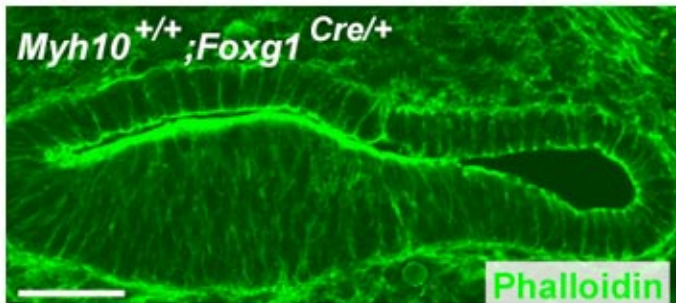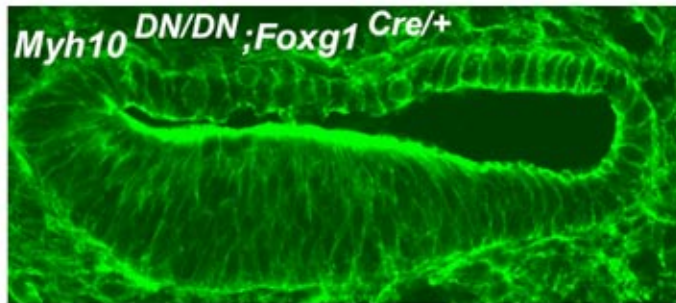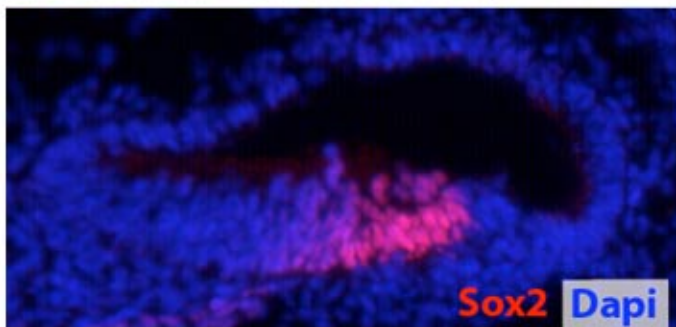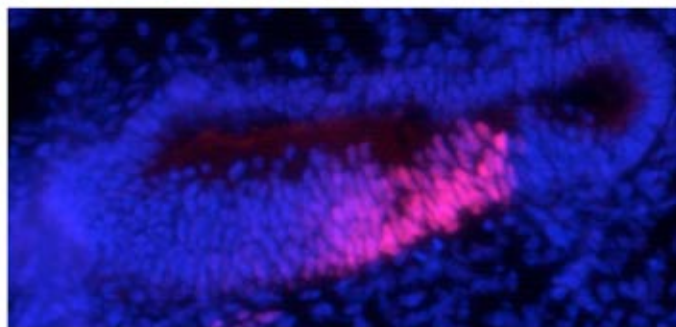

Supplement: supp_136_12_1977__4.pdf [file supp_136_12_1977__4.pdf]
